# Supplementary material for: Transcriptome Analysis of Differentially Expressed mRNA Related to Pigeon Muscle Development
Source: MDPI journal article supplement (doi:10.3390/ani11082311), 2021-08-05
Supplement: s1 [file s1]

**Supplementary Materials:** Table S1. Statistics of the number of transcripts detected by each sample. Table S2. Statistical table of mRNA transcript results of inter group differences.

Table S1. Statistics of the number of transcripts detected by each sample.

| Sample Name | Known Isoform Num | New Isoform Num | All Isoform Num |
|-------------|-------------------|-----------------|-----------------|
| E8-1        | 13767 (75.86%)    | 11923           | 25690           |
| E8-2        | 13953 (76.88%)    | 12189           | 26142           |
| E8-3        | 13772 (75.89%)    | 11965           | 25737           |
| E13-1       | 13355 (73.59%)    | 11883           | 25238           |
| E13-2       | 13580 (74.83%)    | 12009           | 25589           |
| E13-3       | 13487 (74.32%)    | 11895           | 25382           |
| D1-1        | 13325 (73.42%)    | 11699           | 25024           |
| D1-2        | 13119 (72.29%)    | 11546           | 24665           |
| D1-3        | 13214 (72.81%)    | 11604           | 24818           |
| D10-1       | 13410 (73.89%)    | 11615           | 25025           |
| D10-2       | 13511 (74.45%)    | 11579           | 25090           |
| D10-3       | 13280 (73.18%)    | 11617           | 24897           |

Table S2. Statistical table of mRNA transcript results of inter group differences

| Pairs      | DiffGene(Up) | DiffGene(Down) | All DiffGene |
|------------|--------------|----------------|--------------|
| D1-vs-D10  | 1019         | 1341           | 2360         |
| E13-vs-D1  | 1095         | 1557           | 2652         |
| E13-vs-D10 | 1776         | 3182           | 4958         |
| E8-vs-D1   | 1940         | 4084           | 6024         |
| E8-vs-D10  | 2368         | 5874           | 8242         |
| E8-vs-E13  | 902          | 1057           | 1959         |
